# Supplementary figures and images for: Curcumin prevents cisplatin-induced decrease in the tight and adherens junctions: relation to oxidative stress
Source: Royal Society of Chemistry journal article supplement (doi:10.1039/c5fo00624d), 2015-09-29

## Supplementary figure 1

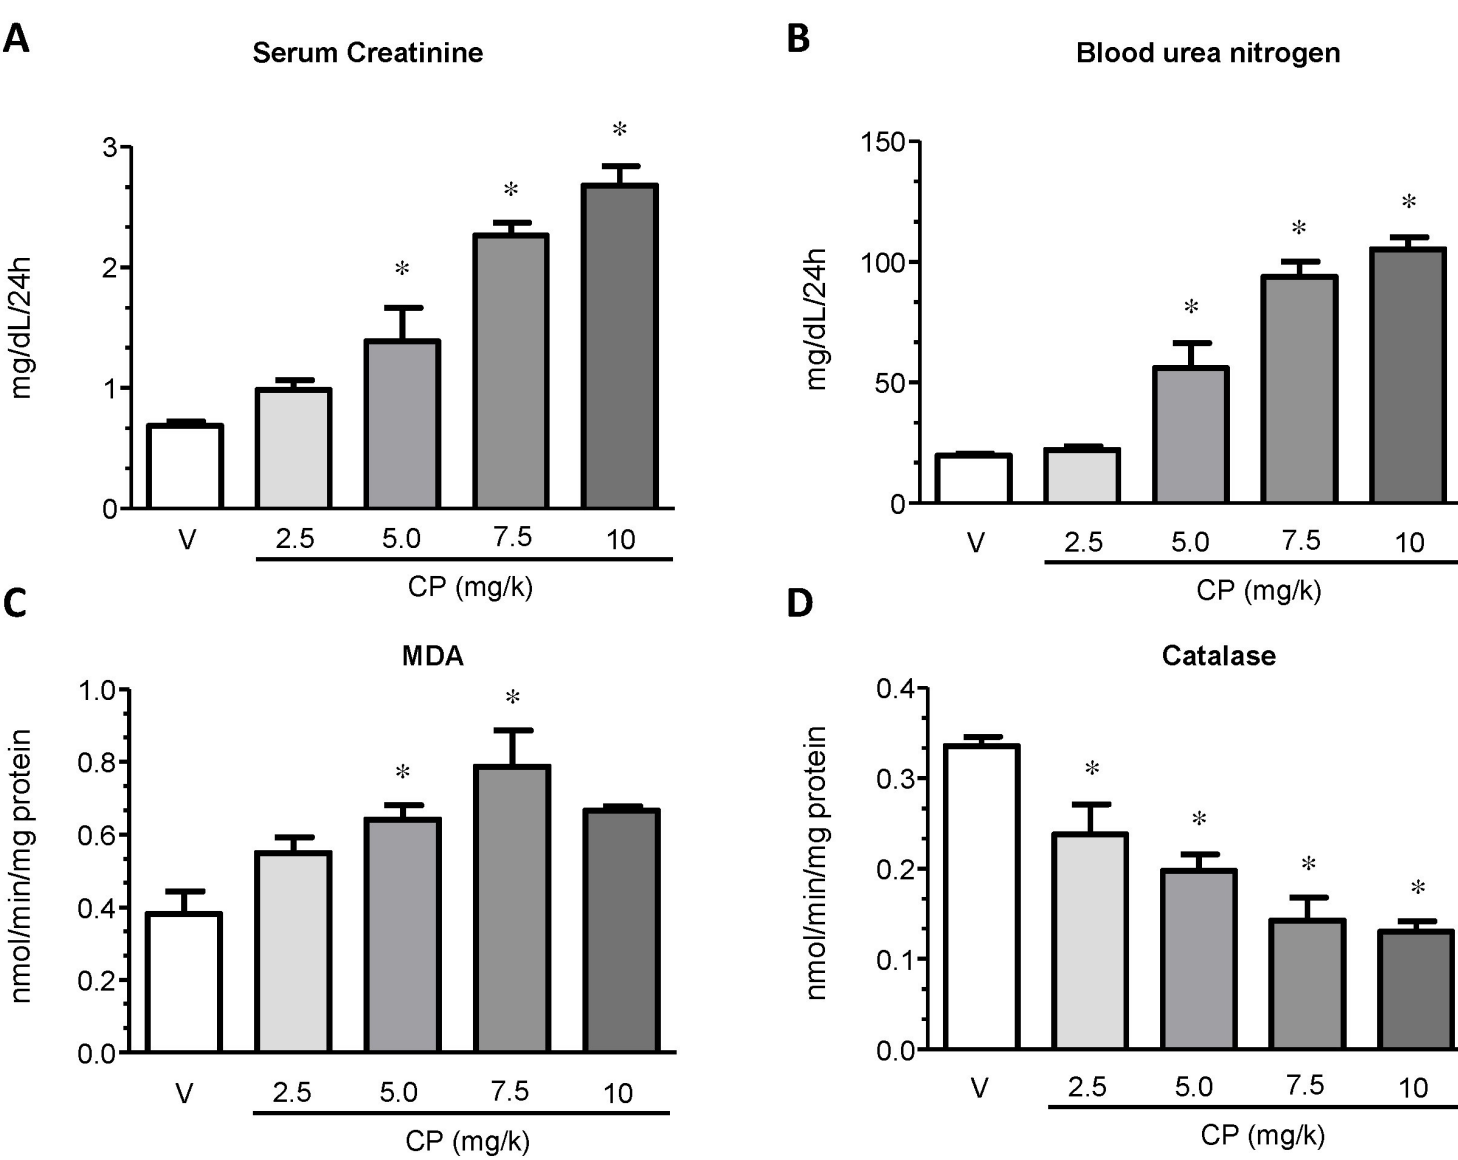

Supplement: c5fo00624d1.pdf [file c5fo00624d1.pdf]
